# Genome-wide association study implicates immune activation of multiple integrin genes in inflammatory bowel disease

Katrina M. de Lange<sup>\*1</sup>, Loukas Moutsianas<sup>\*1</sup>, James C. Lee<sup>\*2</sup>, Christopher A. Lamb<sup>3</sup>, Yang Luo<sup>1,4,5</sup>, Nicholas A. Kennedy<sup>6,7</sup>, Luke Jostins<sup>8,9</sup>, Daniel L. Rice<sup>1</sup>, Javier Gutierrez-Achury<sup>1</sup>, Sun-Gou Ji<sup>1</sup>, Graham Heap<sup>6,7</sup>, Elaine R. Nimmo<sup>10</sup>, Cathryn Edwards<sup>11</sup>, Paul Henderson<sup>12,13</sup>, Craig Mowat<sup>14</sup>, Jeremy Sanderson<sup>15</sup>, Jack Satsangi<sup>10</sup>, Alison Simmons<sup>16,17</sup>, David C. Wilson<sup>18,19</sup>, Mark Tremelling<sup>20</sup>, Ailsa Hart<sup>21</sup>, Christopher G. Mathew<sup>22,23</sup>, William G. Newman<sup>24,25</sup>, Miles Parkes<sup>2</sup>, Charlie W. Lees<sup>10</sup>, Holm Uhlig<sup>26</sup>, Chris Hawkey<sup>27</sup>, Natalie J. Prescott<sup>22</sup>, Tariq Ahmad<sup>6,7</sup>, John C. Mansfield<sup>28</sup>, Carl A. Anderson<sup>\*1</sup>, Jeffrey C. Barrett<sup>\*1</sup>

Genetic association studies have identified 210 risk loci for inflammatory bowel disease<sup>1–7</sup>, which have revealed fundamental aspects of the molecular biology of the disease, including the roles of autophagy and Th17 cell signaling and development. We performed a genome-wide association study of 25,305 individuals, and meta-analyzed with published summary statistics, yielding a total sample size of 59,957 subjects. We identified 26 new genome-wide significant loci, three of which contain integrin genes that encode molecules in pathways identified as important therapeutic targets in inflammatory bowel disease. The associated variants are also correlated with expression changes in response to immune stimulus at two of these genes (*ITGA4*, *ITGB8*) and at two previously implicated integrin loci (*ITGAL*, *ICAM1*). In all four cases, the stimulus-dependent expression increasing allele also increases disease risk. We applied summary statistic fine-mapping and identified likely causal missense variants in the primary immune deficiency gene *PLCG2* and the negative regulator of inflammation, *SLAMF8*. Our results demonstrate that new common variant associations continue to identify genes and pathways of relevance to therapeutic target identification and prioritization.

Inflammatory bowel disease (IBD) is a chronic, debilitating, disorder of the gastrointestinal tract that includes two common disease subtypes, Crohn's disease and ulcerative colitis. Disease pathogenesis is poorly understood but is likely driven by a dysregulated immune response to unknown environmental triggers in genetically susceptible individuals. Treatment regimes often use potent immunomodulators to achieve and maintain remission of symptoms. However, patients commonly experience side effects, lose

response to treatment, or develop complications of IBD, with many ultimately requiring major abdominal surgery. Previous genome-wide association studies (GWAS) and targeted follow-up using the Immunochip have been very successful at identifying genetic risk loci for IBD, but increased biological understanding has not yet had a significant impact on therapy for these disorders.

In order to further expand our understanding of the biology of these disorders we carried out a GWAS of 12,160 IBD cases and 13,145 population controls of European ancestry that had not been included in any genome-wide meta-analysis of IBD to date (Supplementary Table 1, Online Methods). We imputed genotypes using a reference panel comprising whole genome sequences from 4,686 IBD cases<sup>8</sup> and 6,285 publically available population controls<sup>9,10</sup>. Following quality control (Online Methods) we tested 9.7 million sites for association. At the 232 IBD associated SNPs in the latest meta-analysis by the International IBD Genetics Consortium<sup>1</sup>, 228 had effects in the same direction in our data, 188 showed at least nominal evidence of replication ( $P < 0.05$ ) and none showed significant evidence of heterogeneity of effect by Cochran's Q test. Among these replicated loci was a genome-wide significant association on chromosome 10q25 that was only previously significantly associated with Crohn's disease in individuals of East Asian ancestry<sup>3,7</sup>, further supporting near complete sharing of genetic risk loci across populations<sup>1</sup>. We meta-analyzed our new GWAS data with previously published summary statistics from 12,882 IBD cases and 21,770 population controls imputed using the 1000 Genomes Project reference panel<sup>1</sup> (Supplementary Figures 1-3, Supplementary Table 2). We observed inflation of the summary statistics ( $\lambda_{GC} = 1.23$  and 1.29 for Crohn's and ulcerative colitis, respectively), but LD score regression demonstrated that this was due to broad polygenic signal, rather than confounding population substructure (both intercepts = 1.09, Online Methods).

We identified 26 new loci at genome-wide significance (**Table 1**). In order to identify causal variants, genes and mechanisms, we performed a summary-statistic fine-mapping analysis on these loci, as well as 39 previously discovered loci where fine-mapping had not yet been attempted<sup>11</sup> (Online Methods, Supplementary Table 3). In order to be confident about fine-mapping inferences, we restricted subsequent analyses to 12 signals where we had high quality imputed data for all relevant variants (Online Methods). At 6 of these 12 loci we identified a single variant with >50% probability of being causal (**Table 2**, Supplementary Figures 4-6). Among these were two loci where a single variant had >99% probability of being causal: a missense variant predicted to affect protein function in *SLAMF8*, (**Figure**

1a), and an intronic variant in the key regulator of Th17 cell differentiation, *RORC*<sup>12</sup>. SLAMF8 is a cell surface receptor that is expressed on activated myeloid cells and has been reported to negatively regulate inflammatory responses by repressing the production of reactive oxygen species (ROS)<sup>13</sup> and inhibiting their migration to sites of inflammation<sup>14</sup>. *RORC* encodes RORγt, the master transcriptional regulator of Th17 cells<sup>12</sup> and group 3 innate lymphoid cells<sup>15</sup>. Both of these cell types play important roles in defence at mucosal surfaces, especially in the intestine, and have been shown to contribute to the homeostasis between the intestinal immune system and gut microbiota<sup>16,17</sup>, an equilibrium that is known to be lost in inflammatory bowel disease<sup>18</sup>. Pharmacologic inhibition of RORγt has been shown to offer therapeutic benefit in mouse models of intestinal inflammation, and reduces the frequency of Th17 cells isolated from primary intestinal samples of IBD patients<sup>19</sup>.

In loci where fine-mapping was less clearly resolved, we searched for likely functional variants, observing a missense variant predicted to affect protein function (CADD = 16.45, 50.2% probability of causality) in *PLCG2*. Furthermore, after conditioning on this variant, we discovered a second, independent, likely functional (CADD = 34, 74.6% probability of causality) missense variant in the same gene ( $P=2 \times 10^{-8}$ ). *PLCG2* encodes a phospholipase enzyme that plays a critical role in regulating immune pathway signalling<sup>20</sup>, and has previously been implicated in two autosomal dominant immune disorders. Intragenic deletions in its autoinhibitory domain cause antibody deficiency and immune dysregulation (familial cold autoinflammatory syndrome 3, MIM 614468)<sup>21</sup> and heterozygous missense variants (e.g. p.Ser707Tyr) lead to a phenotype that includes intestinal inflammation<sup>22</sup> (**Figure 1b**).

A more general overlap between candidate IBD GWAS genes and Mendelian disorders of inflammation and immunity has been previously observed<sup>23</sup>. In addition to *PLCG2* we identified an association between Crohn's disease and an intronic variant in *NCF4* ( $P=1.76 \times 10^{-8}$ ). This gene encodes p40phox, a component of the NADPH-oxidase system that is responsible for the oxidative burst in innate immune cells and which is a key mechanism of killing phagocytosed bacteria. Rare pathogenic variants in *NCF4* cause autosomal recessive chronic granulomatous disease, characterized by Crohn's disease-like intestinal inflammation and defective ROS production in neutrophils<sup>24</sup>. Our associated variant, rs4821544, had previously been suggestively associated with small bowel Crohn's disease<sup>25,26</sup>, and when we stratified patients by disease location we found that the effect was consistently stronger for small bowel compared to large bowel disease (Supplementary Figure 7).

Among the remaining 22 novel loci we noted three that were within 150kb of integrin genes (*ITGA4*, *ITGAV* and *ITGB8*), while two previously associated loci overlap with a fourth integrin, *ITGAL*, and its binding partner *ICAM1*. Integrins are cell adhesion mediators with bi-directional signalling capabilities that play a crucial role in leukocyte homing and cell differentiation in inflammation and cancer<sup>27</sup>. Given the strong candidacy of these genes, we sought potentially causal molecular mechanisms that would connect the IBD associated SNPs to integrin regulation. Our fine-mapping analysis excluded the possibility that these associations are caused by protein-coding changes, so we next tested for effects of IBD risk SNPs on integrin gene expression in immune cells using nine publicly available eQTL datasets. While many eQTLs and GWAS signals show some degree of correlation, inferences about causality require more robust statistical co-localization of the two signals. Remarkably, we observed three of our five associations had >90% probability of being driven by the same variants as monocyte-specific stimulus response eQTLs (*ITGA4*,  $P_{LPS\_24hr}=0.984$ ; *ITGAL*,  $P_{LPS\_24hr}=0.980$ ; *ICAM1*,  $P_{LPS\_2hr}=0.961$ ; Supplementary Table 4). A fourth association, *ITGB8*, is difficult to map due to extended linkage disequilibrium in the locus, but shows intermediate evidence of co-localization ( $P_{LPS\_24hr}=0.712$ ) in response to the same stimulus (**Figure 2**). These observations suggest upregulation of pro-inflammatory cell surface markers as a potential mechanism of action, as all four of the IBD risk increasing alleles upregulate expression of their respective genes.

Integrins and their counter-receptors have recently emerged as important therapeutic targets in IBD. Most promisingly monoclonal antibodies that target the components of the  $\alpha4\beta7$  dimer, responsible for the gut-homing specificity of leukocyte subsets, have demonstrated efficacy in IBD<sup>28–30</sup>. Additionally, an antisense oligonucleotide targeting *ICAM1* has shown promise in the treatment of ulcerative colitis and pouchitis<sup>31</sup>. The importance of gut-selectivity for therapeutic approaches is highlighted by the success of antibodies that bind the  $\alphaL$  and  $\alpha4$  integrin subunits. Whilst  $\alphaL$ -directed therapy with efalizumab demonstrated potential in Crohn's disease<sup>32</sup>, and  $\alpha4$ -directed therapy (which binds  $\alpha4\beta1$  in addition to  $\alpha4\beta7$  integrin) with natalizumab is licensed in the USA for Crohn's disease<sup>33</sup>, both medications have been associated with occurrences of progressive multifocal leukoencephalopathy (PML). This potentially fatal condition is likely mediated by impaired leukocyte migration to the central nervous system leading to JC virus infection of the brain. Owing to the risk of PML, efalizumab has been withdrawn from the market and natalizumab is not licensed for Crohn's disease in Europe.

Integrins are not only important in cell trafficking, but can also participate in cellular signalling. For example, the  $\alpha\text{V}\beta 8$  heterodimer – both subunits of which are now within confirmed IBD loci – is a potent activator of  $\text{TGF}\beta^{34}$ , with a range of cell-type specific effects. Furthermore, mice with dendritic-cell specific deletion of this complex had impaired regulatory T cell function and severe colitis<sup>35</sup>, whereas deleting the complex in regulatory T cells themselves prevented them from suppressing pathogenic T cell responses during active inflammation<sup>36</sup>. While no current IBD therapeutics target  $\alpha\text{V}\beta 8$  directly, promising early results of an oral antisense oligonucleotide to the inhibitory  $\text{TGF}\beta$ -signalling protein  $\text{SMAD7}^{37}$ , itself encoded by a locus identified by genetic association studies<sup>23</sup>, demonstrate the therapeutic potential of modifying  $\text{TGF}\beta$  signaling in Crohn's disease.

In addition to the connections to anti-integrin and anti- $\text{TGF}\beta$  therapies described above, IBD GWAS have previously implicated loci containing other therapeutically relevant genes, such as those in pathways targeted by anti-TNF and anti-p40 IBD therapies (**Figure 3**). These discoveries have demonstrated that the importance of the biological pathways underlying associations, and their potential therapeutic relevance, are not necessarily reflected in their GWAS effect sizes. For example, the modest odds ratios of the signals near integrin genes (1.10-1.12) required tens of thousands of samples to detect at genome-wide significance. Furthermore, analyses aimed at understanding the specific cellular contexts in which these genes are active in IBD, as well as the risk-increasing direction of effect (e.g. consistent up-regulation of integrins in response to LPS stimulus), are only beginning to bear fruit.

Our study has demonstrated that continuing to pursue GWAS, even in a well studied complex disease like IBD, has the potential to complement other powerful approaches, such as targeted genotyping (via the Immunochip) and large-scale genome and exome sequencing. In two cases we have implicated genes in which different variants have previously been shown to cause immune-related Mendelian disorders, echoing a connection made to the very first Crohn's disease risk gene, *NOD2*, in which rare missense mutations cause the autosomal dominant granulomatous disorder Blau syndrome<sup>38</sup>. Finally, while the individual effect sizes of our newly discovered associations are modest, we believe that our results show that GWAS continues to deliver new understanding of disease biology and new therapeutic opportunities.

## Acknowledgements

We would like to thank all individuals who contributed samples to the study. This work was co-funded by the Wellcome Trust [098051] and the Medical Research Council, UK [MR/J00314X/1]. Case collections were supported by Crohn's and Colitis UK. KMdL, LM, CAL, YL, DR, JG-A, NJP, CAA and JCB are supported by the Wellcome Trust [098051; 093885/Z/10/Z; 094491/Z/10/Z]. KMdL is supported by a Woolf Fisher Trust scholarship. CAL is a clinical lecturer funded by the NIHR. We thank Anna Stanton for co-ordinating the Guy's and St Thomas' patient recruitment. We acknowledge support from the Department of Health via the NIHR comprehensive Biomedical Research Centre awards to Guy's and St Thomas' NHS Foundation Trust in partnership with King's College London and to Addenbrooke's Hospital, Cambridge in partnership with the University of Cambridge. This research was also supported by the NIHR Newcastle Biomedical Research Centre.

**Author contributions:** KMdL, LM, YL, LJ, DLR, CAA, and SGJ performed statistical analysis. KMdL, LM, YL, LJ, JCL, JGA, SGJ, CAL, NAK, and CAA analysed the data. GH, ERN, CE, CM, AS, DCW, MT, AH, CGM, MP, WGN, CWL, HU, CH, NJP, TA, JCM, JackS, JerS, and PH contributed samples/materials. CAA, JCB, KMdL, LM, JCL, CGM, MP, CAL, NAK, YL, and PH wrote the paper. JCB, CAA, JCM, MP, CWL, TA, and NJP conceived & designed experiments. JCB and CAA jointly supervised research. KMdL, LM, and JCL contributed equally to this work.

## Competing financial interests:

The authors declare no competing financial interests.

## Materials & Correspondence:

Correspondence should be addressed to Jeffrey C. Barrett (jb26@sanger.ac.uk) and Carl A. Anderson (ca3@sanger.ac.uk).

# Author affiliations

- [1] Wellcome Trust Sanger Institute, Wellcome Trust Genome Campus, Hinxton, UK
- [2] Inflammatory Bowel Disease Research Group, Addenbrooke's Hospital, Cambridge, UK
- [3] Institute of Cellular Medicine, Newcastle University, Newcastle upon Tyne
- [4] Division of Genetics and Rheumatology, Brigham and Women's Hospital, Harvard Medical School, Boston, MA, USA
- [5] Program in Medical and Population Genetics, Broad Institute of Harvard and MIT, Cambridge, MA, USA
- [6] Precision Medicine Exeter, University of Exeter, Exeter, UK
- [7] IBD Pharmacogenetics, Royal Devon and Exeter Foundation Trust, Exeter, UK
- [8] Wellcome Trust Centre for Human Genetics, University of Oxford, Headington, UK
- [9] Christ Church, University of Oxford, St Aldates, UK
- [10] Gastrointestinal Unit, Wester General Hospital University of Edinburgh, Edinburgh, UK
- [11] Department of Gastroenterology, Torbay Hospital, Torbay, Devon, UK
- [12] Department of Child Life and Health, University of Edinburgh, Edinburgh, UK
- [13] Department of Paediatric Gastroenterology and Nutrition, Royal Hospital for Sick Children, Edinburgh, UK
- [14] Department of Medicine, Ninewells Hospital and Medical School, Dundee, UK
- [15] Guy's & St Thomas' NHS Foundation Trust, St Thomas' Hospital, Department of Gastroenterology, London, UK
- [16] Translational Gastroenterology Unit, John Radcliffe Hospital, University of Oxford, Oxford OX3 9DS, UK
- [17] Human Immunology Unit, Weatherall Institute of Molecular Medicine, University of Oxford, Oxford OX3 9DS, UK
- [18] Paediatric Gastroenterology and Nutrition, Royal Hospital for Sick Children, Edinburgh, UK
- [19] Child Life and Health, University of Edinburgh, Edinburgh, Scotland, UK
- [20] Gastroenterology & General Medicine, Norfolk and Norwich University Hospital, Norwich, UK
- [21] Department of Medicine, St Mark's Hospital, Harrow, Middlesex, UK
- [22] Department of Medical and Molecular Genetics, Faculty of Life Science and Medicine, King's College London, Guy's Hospital, London, UK
- [23] Sydney Brenner Institute for Molecular Bioscience, Faculty of Health Sciences, University of Witwatersrand, South Africa.
- [24] Genetic Medicine, Manchester Academic Health Science Centre, Manchester, UK
- [25] The Manchester Centre for Genomic Medicine, University of Manchester, Manchester, UK
- [26] Translational Gastroenterology Unit and the Department of Paediatrics, University of Oxford, Oxford, United Kingdom
- [27] Nottingham Digestive Diseases Centre, Queens Medical Centre, Nottingham, UK
- [28] Institute of Human Genetics, Newcastle University, Newcastle upon Tyne, UK



## Online Methods

### New genome-wide genetic data

*GWAS samples and genotyping.* 11,768 British IBD cases, diagnosed using accepted endoscopic, histopathological and radiological criteria, were genotyped on the Human Core Exome v12.1. 10,484 population control samples genotyped on the Human Core Exome v12.0 were obtained from the Understanding Society Project. Genotypes were called using optiCall<sup>39</sup>.

*GWAS quality control.* We removed variants that did not overlap between the two versions of the chip, had missingness > 5%, a significant difference in call rate between cases and controls ( $P < 1 \times 10^{-5}$ ), deviated from Hardy-Weinberg equilibrium (HWE) in controls ( $P < 1 \times 10^{-5}$ ), or that were affected by a genotyping batch effect (significant association [ $P < 1 \times 10^{-5}$ ] between an outlier group of cases discovered using principal component analysis [ $PC1 < -0.005$ ], and the remainder of the samples). We then removed samples with missingness > 1%, heterozygosity  $\pm 3$  standard deviations from the mean, mismatch between reported and genotypic sex, first-degree relatives or closer (kinship coefficient > 0.177), and non-European samples identified through principal component analysis with HapMap3 populations. After quality control, data were available for 4,474 Crohn's disease, 4,173 ulcerative colitis, 592 IBD-unclassified cases and 9,500 controls for 296,203 variants.

*Whole-genome sequenced samples.* We generated low-coverage whole genome sequences for 4,686 IBD cases and 3,781 population controls from the UK IBD Genetics Consortium (UKIBDGC) and UK10K Consortium, respectively. Detailed information on sequencing, genotype refinement and quality control are described elsewhere<sup>8</sup>.

*Imputation.* These sequences were combined with 2,504 samples from the Phase 3 v5 release of the 1000 Genomes project (2013-05-02 sequence freeze) to create a phased imputation reference panel enriched in IBD-associated variants. We used PBWT<sup>40</sup> to impute from this reference panel (114.2 million total variants) into our new GWAS described above.



## Association testing, meta-analysis, and quality control.

*Association testing.* Prior to association testing, we removed all samples that were included in previous IBD GWAS meta-analyses (Supplementary Table 1). We then tested for association to ulcerative colitis, Crohn's disease and IBD separately within the sequenced samples and new GWAS using SNPTTEST v2.5, performing an additive frequentist association test conditioned on the first ten principal components for each cohort. We filtered out variants with minor allele frequency (MAF) < 0.1%, INFO < 0.4, or strong evidence for deviations from HWE in controls ( $p_{\text{HWE}} < 1 \times 10^{-7}$ ).

*Meta-analysis.* We used METAL (release 2011-03-05) to perform a standard error weighted meta-analysis of our sequencing and GWAS cohorts with the publicly available International Inflammatory Bowel Disease Genetics Consortium (IIBDGC) meta-analysis summary statistics<sup>1</sup>, after applying the additional MAF  $\geq 0.1\%$ , and INFO  $\geq 0.4$  filters to the IIBDGC data.

*Quality control.* The output of the fixed-effects meta-analysis was further filtered, and sites with high evidence for heterogeneity ( $I^2 > 0.90$ ) were discarded. Only sites for which all cohorts passed our quality control filters were included in our analysis. In addition, we discarded genome-wide significant variants for which the meta-analysis p-value was not lower than all of the cohort-specific p-values.

*LD score regression.* We performed LD score regression using LDSC v1.0.0 and European linkage disequilibrium (LD) scores from the 1000 Genomes Project (downloaded from [https://data.broadinstitute.org/alkesgroup/LDSCORE/eur\\_w\\_ld\\_chr.tar.bz2](https://data.broadinstitute.org/alkesgroup/LDSCORE/eur_w_ld_chr.tar.bz2)) on our filtered meta-analysis summary statistics for all sites with INFO > 0.95. This INFO threshold is to avoid confounding due to poor imputation, as recommended by the authors<sup>41</sup>.

## Locus definition

*Computing LD windows.* An LD window was calculated for every genome-wide significant variant in any of the three traits (Crohn's disease, ulcerative colitis, IBD), defined by the left-most and right-most variants that are correlated with the main variant with an  $r^2$  of 0.6 or more. The LD was calculated in the GBR and CEU samples from the 1000 Genomes Phase 3, release v5 (based on 20130502 sequence freeze and alignments). Loci with overlapping LD windows, as well as loci whose lead variants were separated by 500kb or less, were subsequently merged, and the variant with the strongest evidence of being associated was kept as the lead variant for each merged locus.

*Identifying novel loci.* A locus was annotated as known if it contained at least one variant previously reported at genome-wide significance (irrespective of the LD between that variant and the most associated variants in the locus). To ensure that putatively novel signals were not due to long-range LD with variants in previously reported loci, we conducted conditional analysis in our new GWAS for all variants in loci which were less than 3Mb away from a known locus. Putatively novel loci already known in a lower order IBD trait (e.g. a previously known Crohn's disease locus coming up as an IBD locus) were also removed from this list. This did not apply where, for example, a known Crohn's disease locus was now associated with ulcerative colitis, or vice versa.

## **Fine-mapping**

Approximate Bayes factors were calculated from the meta-analysis effect sizes and standard errors described above by applying equation (2) of Wakefield<sup>42</sup>, assuming a prior variance on the log odds ratios of 0.04 (the default prior used by the software SNPTest, and used by Maller *et al*<sup>43</sup>). We then performed fine-mapping using these Bayes factors as described in Maller *et al* to calculate the posterior that each variant is causal, and the 95% credible set for each association (the smallest set of variants with posteriors that sum to at least 95%). For each association we use the meta-analysis results for the phenotype (Crohn's disease, ulcerative colitis or IBD) specified in Table 1. We only consider a locus to be confidently fine-mapped if there are no variants in the Phase 3 v5 release of the 1000 Genomes project (2013-05-02 sequence freeze) in high LD ( $r^2 \geq 0.6$ ) with our hit SNP, but missing from our dataset, and no variants in our data within high LD ( $r^2 > 0.8$ ) that fail during our QC procedure.

## **eQTL overlap**

*Identifying eQTL overlaps.* Nine eQTL datasets were searched to identify variants within the 26 newly identified IBD risk loci that are associated with variation in gene expression (Supplementary Table 5). Splice-QTLs based on exon-ratio<sup>44</sup> and transcript-ratio<sup>45-47</sup> were also included in the search where available (Supplementary Table 5). The most significant variant-gene associations were extracted from each eQTL/splice-QTL dataset and were reported as candidates if that variant had  $r^2 > 0.8$  with any of the lead SNPs in the 26 IBD risk loci.

*Testing for co-localization.* We tested for co-localization between IBD association signals and eQTLs using the coloc2 method<sup>48</sup>, implemented in the R package coloc. We used a window size of 250kb on

289 either side of the IBD association, and implemented the default settings as recommended. Each test was  
 290 repeated using two different values for the prior probability of co-localization,  $p_{12}$ :  $1 \times 10^{-5}$  and  $1 \times 10^{-6}$ .

## References

1. Liu, J. Z. *et al.* Association analyses identify 38 susceptibility loci for inflammatory bowel disease and highlight shared genetic risk across populations. *Nat. Genet.* **47**, 979–989 (2015).
2. Parkes, M. *et al.* Sequence variants in the autophagy gene IRGM and multiple other replicating loci contribute to Crohn's disease susceptibility. *Nat. Genet.* **39**, 830–832 (2007).
3. Yamazaki, K. *et al.* A Genome-Wide Association Study Identifies 2 Susceptibility Loci for Crohn's Disease in a Japanese Population. *Gastroenterology* **144**, 781–788 (2013).
4. Anderson, C. A. *et al.* Meta-analysis identifies 29 additional ulcerative colitis risk loci, increasing the number of confirmed associations to 47. *Nat. Genet.* **43**, 246–252 (2011).
5. Kenny, E. E. *et al.* A genome-wide scan of Ashkenazi Jewish Crohn's disease suggests novel susceptibility loci. *PLoS Genet.* **8**, (2012).
6. Julià, A. *et al.* A genome-wide association study identifies a novel locus at 6q22.1 associated with ulcerative colitis. *Hum. Mol. Genet.* **23**, 6927–6934 (2014).
7. Yang, S.-K. *et al.* Genome-wide association study of Crohn's disease in Koreans revealed three new susceptibility loci and common attributes of genetic susceptibility across ethnic populations. *Gut* **63**, 80–87 (2014).
8. Luo, Y. *et al.* Exploring the genetic architecture of inflammatory bowel disease by whole genome sequencing identifies association at ADCY7. *Nature Genetics*, *submitted*
9. Walter, K. *et al.* The UK10K project identifies rare variants in health and disease. *Nature* **526**, 82–90 (2015).
10. 1000 Genomes Project Consortium *et al.* A global reference for human genetic variation. *Nature* **526**, 68–74 (2015).
11. Huang, H. *et al.* Association mapping of inflammatory bowel disease loci to single variant resolution. *bioRxiv* 028688 (2015). doi:10.1101/028688
12. Ivanov, I. I. *et al.* The Orphan Nuclear Receptor ROR $\gamma$ t Directs the Differentiation Program of Proinflammatory IL-17+ T Helper Cells. *Cell* **126**, 1121–1133 (2006).
13. Wang, G. *et al.* Cutting edge: Slamf8 is a negative regulator of Nox2 activity in macrophages. *J. Immunol.* **188**, 5829–5832 (2012).
14. Wang, G. *et al.* Migration of myeloid cells during inflammation is differentially regulated by the cell surface receptors Slamf1 and Slamf8. *PLoS One* **10**, e0121968 (2015).
15. Luci, C. *et al.* Influence of the transcription factor ROR $\gamma$  on the development of NKp46+ cell populations in gut and skin. *Nat. Immunol.* **10**, 75–82 (2009).
16. Yang, Y. *et al.* Focused specificity of intestinal TH17 cells towards commensal bacterial antigens. *Nature* **510**, 152–156 (2014).

17. Sawa, S. *et al.* ROR $\gamma$ t<sup>+</sup> innate lymphoid cells regulate intestinal homeostasis by integrating negative signals from the symbiotic microbiota. *Nat. Immunol.* **12**, 320–326 (2011).
18. Gevers, D. *et al.* The treatment-naïve microbiome in new-onset Crohn's disease. *Cell Host Microbe* **15**, 382–392 (2014).
19. Withers, D. R. *et al.* Transient inhibition of ROR- $\gamma$ t therapeutically limits intestinal inflammation by reducing TH17 cells and preserving group 3 innate lymphoid cells. *Nat. Med.* **22**, 319–323 (2016).
20. Fu, G., Chen, Y., Schuman, J., Wang, D. & Wen, R. Phospholipase C $\gamma$ 2 plays a role in TCR signal transduction and T cell selection. *J. Immunol.* **189**, 2326–2332 (2012).
21. Ombrello, M. J. *et al.* Cold urticaria, immunodeficiency, and autoimmunity related to PLCG2 deletions. *N. Engl. J. Med.* **366**, 330–338 (2012).
22. Zhou, Q. *et al.* A hypermorphic missense mutation in PLCG2, encoding phospholipase C $\gamma$ 2, causes a dominantly inherited autoinflammatory disease with immunodeficiency. *Am. J. Hum. Genet.* **91**, 713–720 (2012).
23. Jostins, L. *et al.* Host-microbe interactions have shaped the genetic architecture of inflammatory bowel disease. *Nature* **491**, 119–124 (2012).
24. Matute, J. D. *et al.* A new genetic subgroup of chronic granulomatous disease with autosomal recessive mutations in p40 phox and selective defects in neutrophil NADPH oxidase activity. *Blood* **114**, 3309–3315 (2009).
25. Rioux, J. D. *et al.* Genome-wide association study identifies new susceptibility loci for Crohn disease and implicates autophagy in disease pathogenesis. *Nat. Genet.* **39**, 596–604 (2007).
26. Roberts, R. L. *et al.* Confirmation of association of IRGM and NCF4 with ileal Crohn's disease in a population-based cohort. *Genes Immun.* **9**, 561–565 (2008).
27. Hynes, R. O. Integrins: bidirectional, allosteric signaling machines. *Cell* **110**, 673–687 (2002).
28. Sandborn, W. J. *et al.* Vedolizumab as induction and maintenance therapy for Crohn's disease. *N. Engl. J. Med.* **369**, 711–721 (2013).
29. Feagan, B. G. *et al.* Vedolizumab as induction and maintenance therapy for ulcerative colitis. *N. Engl. J. Med.* **369**, 699–710 (2013).
30. Vermeire, S. *et al.* Etrolizumab as induction therapy for ulcerative colitis: a randomised, controlled, phase 2 trial. *Lancet* **384**, 309–318 (2014).
31. Hosten, T. A., Zhao, K., Han, H. Q., Liu, G. & He, X. H. Alicaforsen: An Emerging Therapeutic Agent for Ulcerative Colitis and Refractory Pouchitis. *Gastroenterol. Res. Pract.* **7**, 51–55 (2014).
32. James, D. G., Seo, D. H., Chen, J., Vemulapalli, C. & Stone, C. D. Efalizumab, a human monoclonal anti-CD11a antibody, in the treatment of moderate to severe Crohn's disease: An open-label pilot study. *Dig. Dis. Sci.* **56**, 1806–1810 (2011).
33. Sandborn, W. J. *et al.* Natalizumab induction and maintenance therapy for Crohn's disease. *N. Engl. J. Med.*

- 358        **353**, 1912–1925 (2005).
- 359    34. Travis, M. A. & Sheppard, D. TGF- $\beta$  activation and function in immunity. *Annu. Rev. Immunol.* **32**, 51–82 (2014).
- 360    35. Travis, M. A. *et al.* Loss of integrin  $\alpha(v)\beta8$  on dendritic cells causes autoimmunity and colitis in mice.
- 361        *Nature* **449**, 361–365 (2007).
- 362    36. Worthington, J. J. *et al.* Integrin  $\alpha v \beta 8$ -Mediated TGF- $\beta$  Activation by Effector Regulatory T Cells Is Essential for
- 363        Suppression of T-Cell-Mediated Inflammation. *Immunity* **42**, 903–915 (2015).
- 364    37. Monteleone, G. *et al.* Mongersen, an oral SMAD7 antisense oligonucleotide, and Crohn's disease. *N. Engl. J.*
- 365        *Med.* **372**, 1104–1113 (2015).
- 366    38. Miceli-Richard, C. *et al.* CARD15 mutations in Blau syndrome. *Nat. Genet.* **29**, 19–20 (2001).
- 367    39. Shah, T. S. *et al.* optiCall: a robust genotype-calling algorithm for rare, low-frequency and common variants.
- 368        *Bioinformatics* **28**, 1598–1603 (2012).
- 369    40. Durbin, R. Efficient haplotype matching and storage using the positional Burrows-Wheeler transform (PBWT).
- 370        *Bioinformatics* **30**, 1266–1272 (2014).
- 371    41. Bulik-Sullivan, B. K. *et al.* LD Score regression distinguishes confounding from polygenicity in genome-wide
- 372        association studies. *Nat. Genet.* **47**, 291–295 (2015).
- 373    42. Wakefield, J. Bayes factors for genome-wide association studies: comparison with P-values. *Genet. Epidemiol.*
- 374        **33**, 79–86 (2009).
- 375    43. Wellcome Trust Case Control Consortium *et al.* Bayesian refinement of association signals for 14 loci in 3
- 376        common diseases. *Nat. Genet.* **44**, 1294–1301 (2012).
- 377    44. Zhernakova, D. *et al.* Hypothesis-free identification of modulators of genetic risk factors. *bioRxiv* 033217 (2015).
- 378        doi:10.1101/033217
- 379    45. Battle, A. *et al.* Characterizing the genetic basis of transcriptome diversity through RNA-sequencing of 922
- 380        individuals. *Genome Res.* **24**, 14–24 (2014).
- 381    46. Monlong, J., Calvo, M., Ferreira, P. G. & Guigó, R. Identification of genetic variants associated with alternative
- 382        splicing using sQTLseekeR. *Nat. Commun.* **5**, 4698 (2014).
- 383    47. Ongen, H., Buil, A., Brown, A. A., Dermitzakis, E. T. & Delaneau, O. Fast and efficient QTL mapper for
- 384        thousands of molecular phenotypes. *Bioinformatics* **32**, 1479–1485 (2016).
- 385    48. Giambartolomei, C. *et al.* Bayesian test for colocalisation between pairs of genetic association studies using
- 386        summary statistics. *PLoS Genet.* **10**, e1004383 (2014).

388

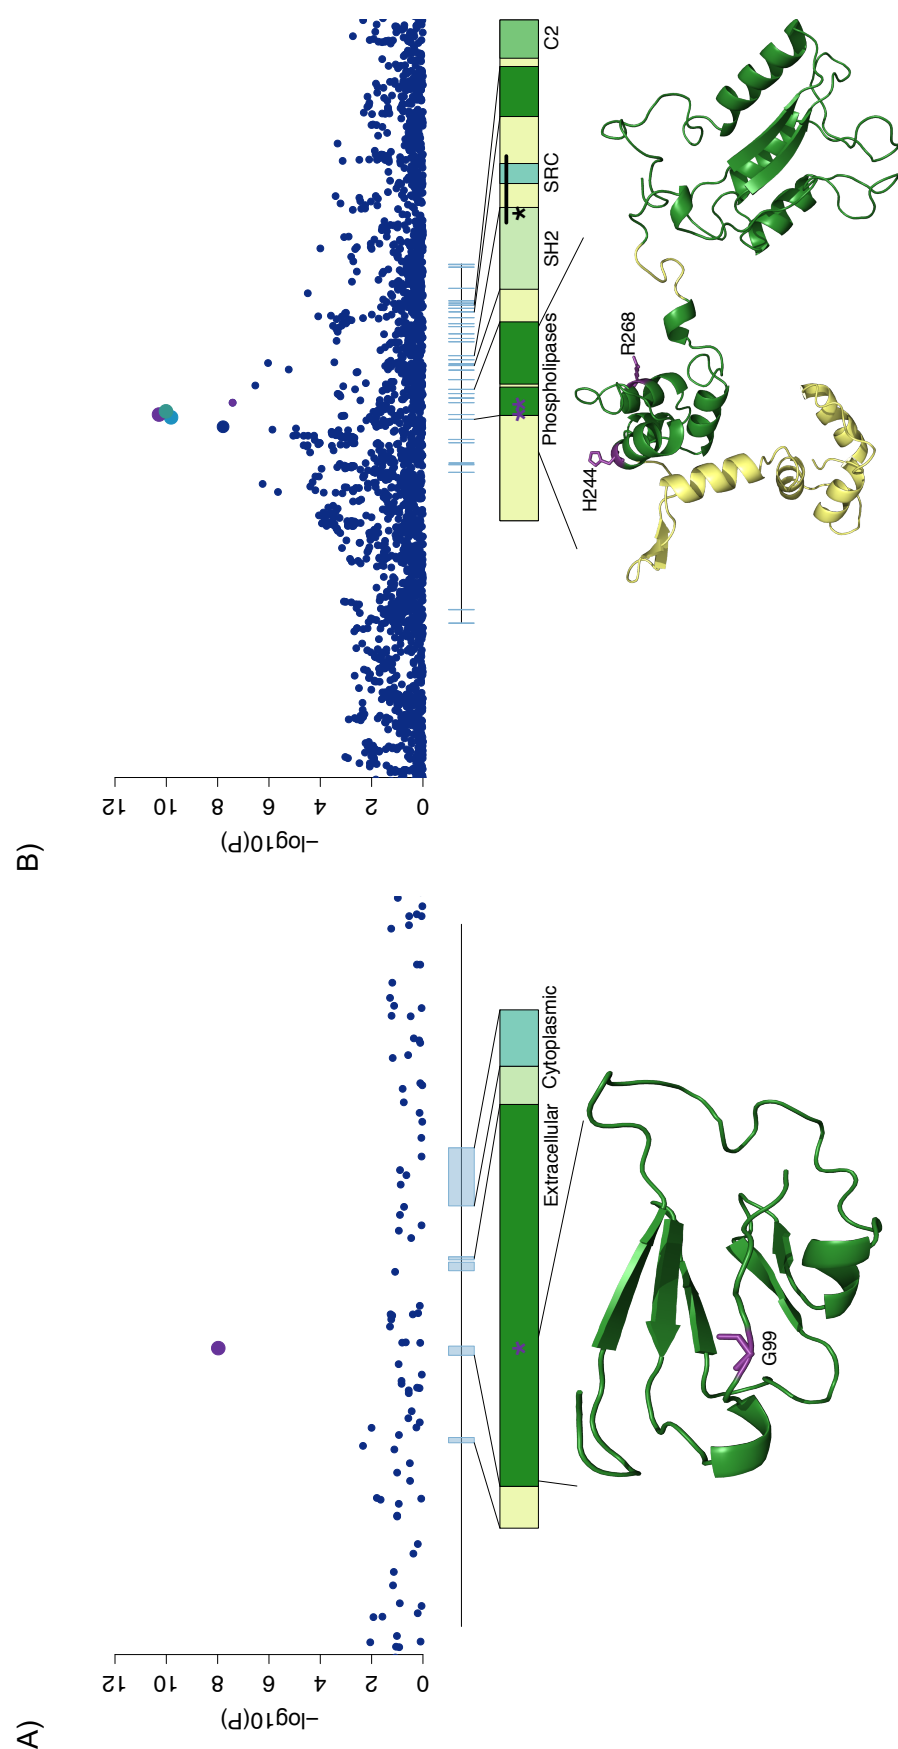

**Figure 1. Likely causal missense variants.** For A) SLAMF8 and B) PLCG2, local association results are plotted with point size corresponding to LD to our lead variant and color to fine-mapping probability (purple > 50%, intermediate blue 10-50%, navy blue <10%). Gene body diagrams and protein domain annotations are taken from ENSEMBL, and partial predicted crystal structures for both proteins are obtained from the SWISS-MODEL repository.



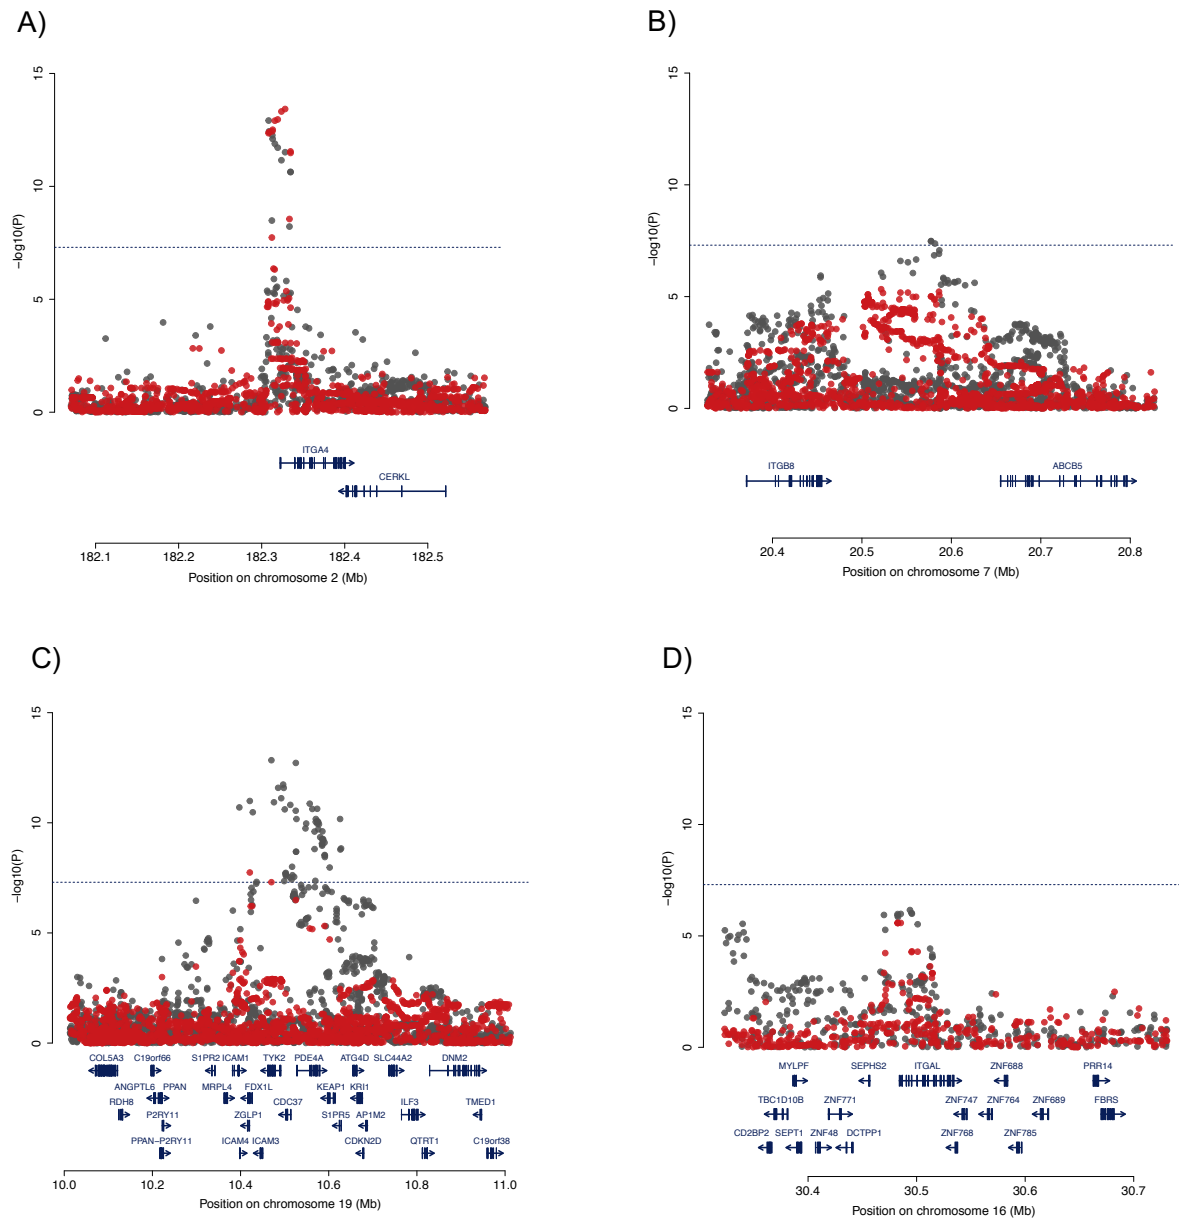

**Figure 2. Co-localization of disease association and stimulus response eQTLs in monocytes.** The local pattern of disease association (IBD: (A) *ITGA4*, (B) *ITGB8*, (C) *ICAM1*; (D) UC: *ITGAL*) in grey, and the association of that variant with response to LPS (lipopolysaccharide) stimulation in red. Evidence of co-localization (probability > 70%) is observed for all for signals.

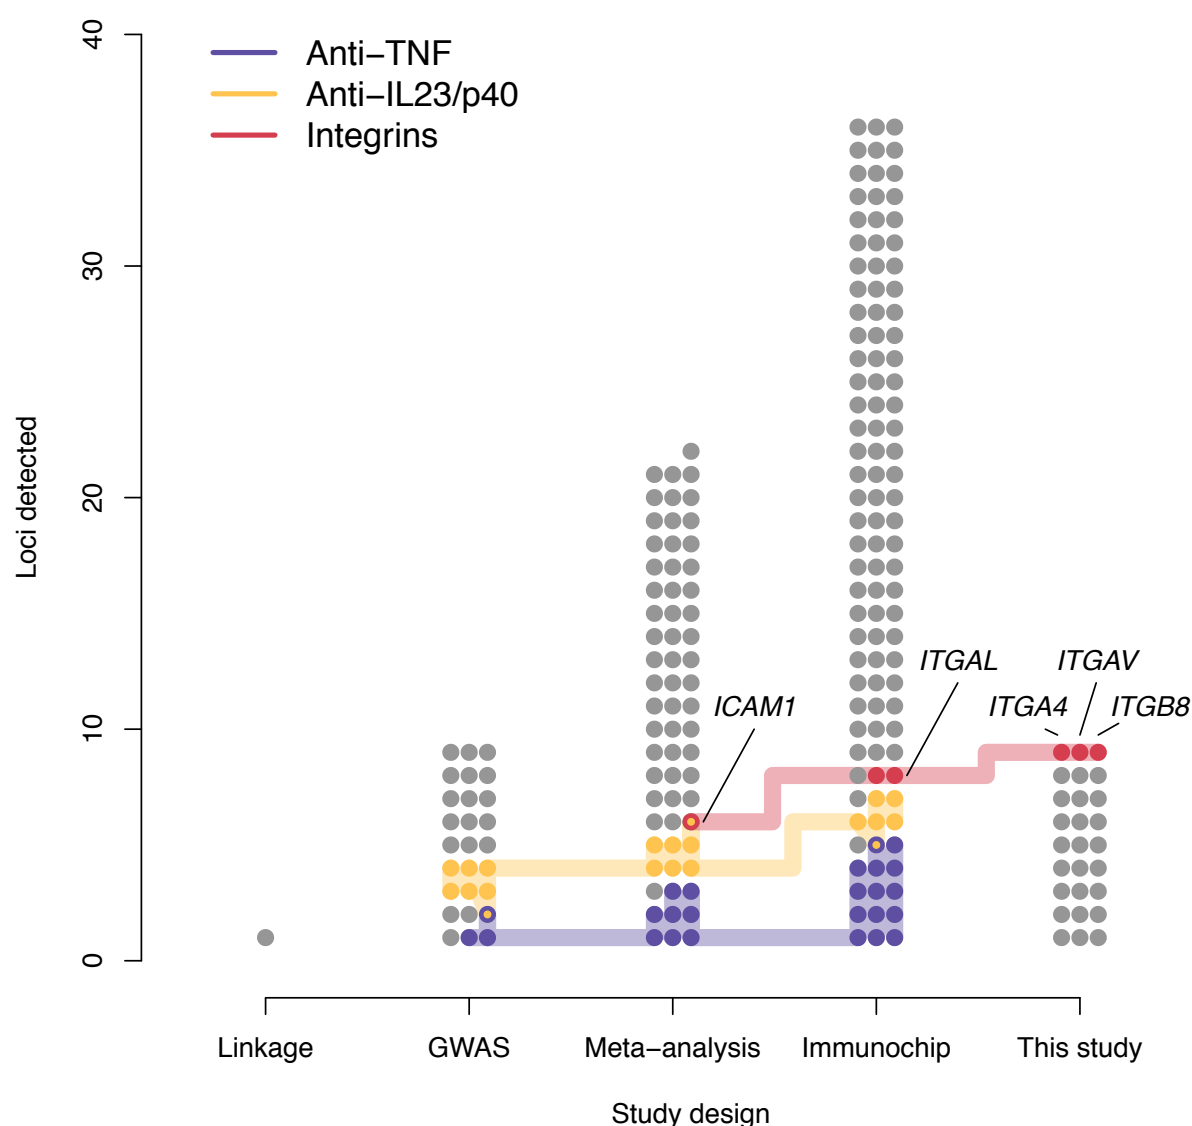

**Figure 3. IBD-associated loci containing genes related to known drug targets.** All IBD loci are divided into the studies where they were first identified<sup>1</sup>. The direct targets and closely related genes of three classes of IBD therapeutics are highlighted, with particular focus on the newly discovered integrin associations. Despite the general pattern that effect size decreases from left to right, therapeutically relevant associations continue to be found.

391

**Table 1. Novel IBD-associated loci.**

| Rsid        | Chr | Position (bp) | Left-right (Mb) | Risk Allele | Non-risk Allele | Risk Allele Frequency in 1000 Genomes CEU+GBR | P <sub>Meta</sub>        | OR (95% CI)      | Phenotype |
|-------------|-----|---------------|-----------------|-------------|-----------------|-----------------------------------------------|--------------------------|------------------|-----------|
| rs34687326  | 1   | 159799910     | 159.8-159.8     | G           | A               | 0.9                                           | 1.06 x 10 <sup>-08</sup> | 1.18 (1.12-1.24) | CD        |
| rs59043219  | 1   | 209970610     | 209.97-210.02   | A           | G               | 0.379                                         | 1.09 x 10 <sup>-08</sup> | 1.08 (1.05-1.10) | IBD       |
| rs6740847   | 2   | 182308352     | 182.31-182.33   | A           | G               | 0.508                                         | 1.22 x 10 <sup>-13</sup> | 1.10 (1.07-1.12) | IBD       |
| rs144344067 | 2   | 187576378     | 187.5-187.68    | A           | AT              | 0.895                                         | 1.29 x 10 <sup>-08</sup> | 1.12 (1.08-1.16) | IBD       |
| rs1811711   | 2   | 228670476     | 228.67-228.67   | C           | G               | 0.826                                         | 6.09 x 10 <sup>-09</sup> | 1.14 (1.1-1.18)  | UC        |
| rs76527535  | 2   | 242484701     | 242.47-242.49   | C           | T               | 0.745                                         | 2.87 x 10 <sup>-08</sup> | 1.09 (1.06-1.12) | IBD       |
| rs2581828   | 3   | 53133149      | 53.1-53.17      | C           | G               | 0.597                                         | 6.46 x 10 <sup>-09</sup> | 1.10 (1.07-1.13) | CD        |
| rs2593855   | 3   | 71175495      | 71.16-71.19     | C           | T               | 0.663                                         | 2.54 x 10 <sup>-09</sup> | 1.09 (1.06-1.11) | IBD       |
| rs503734    | 3   | 101023748     | 100.91-101.27   | A           | G               | 0.513                                         | 2.67 x 10 <sup>-08</sup> | 1.07 (1.05-1.10) | IBD       |
| rs56116661  | 3   | 188401160     | 188.4-188.4     | C           | T               | 0.795                                         | 5.67 x 10 <sup>-10</sup> | 1.14 (1.10-1.18) | CD        |
| rs11734570  | 4   | 38588453      | 38.58-38.59     | A           | G               | 0.368                                         | 4.80 x 10 <sup>-08</sup> | 1.07 (1.05-1.10) | IBD       |
| rs17656349  | 5   | 149605994     | 149.59-149.63   | T           | C               | 0.466                                         | 1.54 x 10 <sup>-08</sup> | 1.09 (1.06-1.13) | UC        |
| rs113986290 | 6   | 19781009      | 19.72-19.83     | C           | T               | 0.989                                         | 7.59 x 10 <sup>-09</sup> | 1.36 (1.25-1.46) | UC        |
| rs67289879  | 6   | 42007403      | 42.42-0.1       | T           | C               | 0.179                                         | 3.04 x 10 <sup>-08</sup> | 1.09 (1.06-1.13) | IBD       |
| rs11768365  | 7   | 6545188       | 6.5-6.55        | A           | G               | 0.816                                         | 3.88 x 10 <sup>-08</sup> | 1.09 (1.06-1.12) | IBD       |
| rs149169037 | 7   | 20577298      | 20.58-20.58     | G           | A               | 0.895                                         | 3.26 x 10 <sup>-08</sup> | 1.14 (1.10-1.19) | IBD       |
| rs243505    | 7   | 148435339     | 148.4-148.58    | A           | G               | 0.624                                         | 3.04 x 10 <sup>-10</sup> | 1.08 (1.06-1.11) | IBD       |
| rs7911117   | 10  | 27179596      | 27.16-27.18     | T           | G               | 0.871                                         | 1.84 x 10 <sup>-08</sup> | 1.14 (1.10-1.19) | UC        |
| rs111456533 | 10  | 126439381     | 126.32-126.55   | G           | A               | 0.829                                         | 1.18 x 10 <sup>-09</sup> | 1.11 (1.08-1.14) | IBD       |
| rs11221335  | 11  | 128385906     | 128.38-128.4    | C           | T               | 0.224                                         | 2.44 x 10 <sup>-08</sup> | 1.09 (1.06-1.12) | IBD       |
| rs80244186  | 13  | 42917861      | 42.84-42.94     | C           | T               | 0.111                                         | 3.66 x 10 <sup>-08</sup> | 1.13 (1.09-1.18) | CD        |
| rs11548656  | 16  | 81916912      | 81.91-81.92     | A           | G               | 0.961                                         | 5.18 x 10 <sup>-11</sup> | 1.27 (1.20-1.34) | IBD       |
| rs10492862  | 16  | 82867456      | 82.87-82.92     | A           | C               | 0.308                                         | 1.26 x 10 <sup>-09</sup> | 1.11 (1.08-1.15) | CD        |
| rs4256018   | 20  | 6093889       | 6.08-6.1        | G           | T               | 0.25                                          | 1.23 x 10 <sup>-08</sup> | 1.08 (1.05-1.11) | IBD       |
| rs138788    | 22  | 35729721      | 35.72-35.74     | A           | G               | 0.418                                         | 2.95 x 10 <sup>-08</sup> | 1.09 (1.06-1.13) | UC        |
| rs4821544   | 22  | 37258503      | 37.26-37.26     | C           | T               | 0.321                                         | 1.76 x 10 <sup>-08</sup> | 1.10 (1.07-1.13) | CD        |

392

Table 2. Variants fine-mapped to >50% probability of being causal in their given locus.

| RsId       | Chr | Position (bp) | P <sub>Causal</sub> | Effect                       | Credible set size | Phenotype | P <sub>Meta</sub>        | Locus type |
|------------|-----|---------------|---------------------|------------------------------|-------------------|-----------|--------------------------|------------|
| rs34687326 | 1   | 159799910     | 1.000               | SLAMF8 p.Gly99Ser (missense) | 1                 | CD        | 1.06 x 10 <sup>-08</sup> | Novel      |
| rs4845604  | 1   | 151801680     | 0.999               | RORC (intronic)              | 1                 | IBD       | 7.09 x 10 <sup>-14</sup> | Known      |
| rs1811711  | 2   | 228670476     | 0.914               |                              | 2                 | UC        | 6.09 x 10 <sup>-09</sup> | Novel      |
| rs56116661 | 3   | 188401160     | 0.561               | LPP (intronic)               | 11                | CD        | 5.67 x 10 <sup>-10</sup> | Novel      |
| rs11548656 | 16  | 81916912      | 0.502               | PLCG2 p.His244Arg (missense) | 3                 | IBD       | 5.18 x 10 <sup>-11</sup> | Novel      |
| rs1143687  | 16  | 81922813      | 0.746               | PLCG2 p.Arg268Trp (missense) | 5                 | IBD       | 3.83 x 10 <sup>-08</sup> | Novel      |
| rs4821544  | 22  | 37258503      | 0.804               | NCF4 (intronic)              | 2                 | CD        | 1.76 x 10 <sup>-08</sup> | Novel      |
